# Supplementary material for: Efficient and economical biosynthesis of high-purity isomaltulose from sugar industrial waste molasses using an engineered Corynebacterium glutamicum strain
Source: Royal Society of Chemistry journal article supplement (doi:10.1039/d1gc04790f), 2022-01-01
Supplement: d1gc04790f1.pdf [file d1gc04790f1.pdf]

## 1. Plasmid Construction

All primers are listed in Supplementary Table S1, and all constructed plasmid are listed in Table 1. For marker-free gene deletion, a series of plasmids were constructed. The vector pK18*mobsacB*- $\Delta$ *scrB* was constructed for *scrB* deletion. The upstream and downstream fragments (*scrB*-F and *scrB*-B, forward and backward fragments) were amplified from the *C. glutamicum* genome using primers ScrB-UF/ScrB-UR and ScrB-DF/ScrB-DR respectively. The two fragments were fused and amplified by fusion PCR with primers ScrB-UF/ScrB-DR. The fused fragment (*scrB*-UD) was digested with *Bam*HI and *Xba*I, and then ligated into the same digested sites of pK18*mobsacB* to create pK18*mobsacB*- $\Delta$ *scrB*. With a similar procedure, pK18*mobsacB*- $\Delta$ *ptsS*, and pK18*mobsacB*- $\Delta$ *scrB* $\Delta$ *ptsS* were also constructed. The fused fragments pK18*mobsacB*- $\Delta$ *ptsS* and pK18*mobsacB*- $\Delta$ *scrB* $\Delta$ *ptsS* were amplified with corresponding primers from the *C. glutamicum* 13032 chromosomal DNA. Digested with *Bam*HI-*Xba*I, these two fragments were ligated into the corresponding sites of digested pK18*mobsacB* to yield plasmid pK18*mobsacB*- $\Delta$ *ptsS* and pK18*mobsacB*- $\Delta$ *scrB* $\Delta$ *ptsS*, respectively.

The shuttle vector pEC-XK99E-*siase*- $\Delta$ *lacIq* was constructed for *siase* expression without addition of isopropyl  $\beta$ -D-1-thiogalactopyranoside (IPTG). The liner fragment of was amplified from vector pEC-XK99E-*siase2* with the primers pEC-*lacIq*-F/L, then was digested with *Spe*I and ligated itself to yield pEC-XK99E-*siase2*- $\Delta$ *lacIq*.

## 2. Strains Construction

All constructed strains are listed in Table 1.

The vector pK18*mobsacB*- $\Delta$ *scrB* was integrated into *C. glutamicum* ATCC 13032 chromosome by the first single-crossover recombination and kanamycin-resistant transformants were selected and

verified by PCR. Next, the resulting transformant was cultured in LB liquid medium for 12h, and then the cells were spread on a LB-sucrose agar plate. The *scrB*-deleted strain, denoted as IS1, was selected from the grown colonies by PCR verification using primers ScrB-UF/ScrB-DR. With a similar procedure above, the *ptsS* gene could be knocked out together using pK18*mobsacB*- $\Delta$ *scrB* $\Delta$ *ptsS* verified by primers PtsS-UF/PtsS-DR. The *ptsS* were deleted in *C. glutamicum* ATCC 13032 step by step, generating IS5.

The shuttle vector pEC-XK99E-*siase0*, pEC-XK99E-*siase1*, pEC-XK99E-*siase2*, pEC-XK99E-*siase3*, were introduced into *C. glutamicum* ATCC13032, yielding IS3, IS4, IS6 and IS7, respectively. The transformant IS3 was obtained by introducing the plasmid pEC-XK99E-*siase0* into IS1. The transformant IS4 was obtained by introducing the plasmid pEC-XK99E-*siase1* into IS1. The transformant IS6 was obtained by introducing the plasmid pEC-XK99E-*siase2* into IS5. The transformant IS7 was obtained by introducing the plasmid pEC-XK99E-*siase3* into IS5. The transformant IS8 was obtained by introducing the plasmid pEC-XK99E-*siase2*- $\Delta$ *lacI* into IS6.

**Table S1.** Primers used in this study

| Primer name               | Sequence (5'-3') *                                                       |
|---------------------------|--------------------------------------------------------------------------|
| <i>ΔscrB</i> construction |                                                                          |
| ScrB-UF                   | <u>GCGGATCCCTGGG</u> CCAATGGCGATGAAT ( <i>Bam</i> HI)                    |
| ScrB-UR                   | AGGAAAGTAGTGTGTGGGGCTATCATAAAAAAGGGTCTTTTG<br>T                          |
| ScrB-DF                   | ACAAAAGACCCTTTTTTATGATAGCCCCACACACTACTTTCCT                              |
| ScrB-UR                   | <u>TCTAGAGCGCAGGGG</u> TATGACGCTT ( <i>Xba</i> I)                        |
| <i>ΔptsS</i> construction |                                                                          |
| PtsS-UF                   | <u>GGATCCGACGGTA</u> ACCCACCGCAGCTTCACT( <i>Bam</i> HI)                  |
| PtsS-UR                   | CCCGGTTAAGGAGAAATTCAAGTTGAAACCTTGAGTGTTC                                 |
| PtsS-DF                   | GAACACTCAAGTTTCAACTTGAATTTCTCCTTAACCGGG                                  |
| PtsS-DR                   | <u>TCTAGATTTACACCCC</u> ATTACCGCGAT( <i>Xba</i> I)                       |
| <i>Δlacq</i> construction |                                                                          |
| Lacq-F                    | <u>CGACTAGTGAGCGCA</u> ACGCAATTAATGTGAGTT ( <i>Spe</i> I)                |
| Lacq-R                    | <u>ACTAGT</u> ATTCACCACCCTGAATTGACTCTC ( <i>Spe</i> I)                   |
| siase0                    |                                                                          |
| F0-                       | <u>CGGAATTCGCAACGA</u> ATATACAAAAGTCCGCTGATTTTCCC<br>AT ( <i>Eco</i> RI) |
| R0-                       | <u>GGTCGACGTT</u> CAGCTTATAGATCCCGGCTTGCCACGGAGC( <i>Sal</i><br>I)       |
| siase1                    |                                                                          |
| F1                        | <u>CGGAATTCATGTTT</u> CTTAATGGATTTAAG( <i>Eco</i> RI)                    |
| R1                        | <u>GGTCGACGTT</u> CAGCTTATAGATCCCGGCTTGCCACGGAGC( <i>Sal</i><br>I)       |
| siase2                    |                                                                          |
| F2                        | <u>CGATATCTGAGCTG</u> TTGACAATTAATCAT ( <i>Eco</i> RV)                   |
| R2                        | <u>TCTAGACAAAAAAGGG</u> CATCCGTCAGGAT ( <i>Xba</i> I)                    |
| siase3                    |                                                                          |
| F3                        | <u>CGATATCTGAGCTG</u> TTGACAATTAATCAT ( <i>Eco</i> RV)                   |
| R3                        | <u>TCTAGACAAAAAAGGG</u> CATCCGTCAGGAT ( <i>Xba</i> I)                    |

\*Restriction sites are underlined, and the restriction enzymes are indicated in parentheses.

**Table S2.** Comparison of the costs from different substrates for isomaltulose production by different engineered food-grade strains and purity. The cost of feedstocks for producing one ton of isomaltulose was calculated based on the current market prices and the reported conversion rate of sucrose.

| Strains                           | Substrate cost (yuan/ton isomaltulose) | Isomaltulose Yield (g/g) | Isomaltulose purity (%) | References    |
|-----------------------------------|----------------------------------------|--------------------------|-------------------------|---------------|
| <i>Lactococcus lactis</i>         | Sucrose; 12,500                        | 0.72                     | < 90                    | 30            |
| <i>Saccharomyces cerevisiae</i>   | Sucrose; > 20,000                      | 0.07                     | < 10                    | 49            |
| <i>Yarrowia lipolytica</i>        | Sucrose; 8,646                         | 0.96                     | 97.8                    | 44            |
| <i>Bacillus subtilis</i>          | PCM; 3,800                             | 0.92                     | < 92.4                  | 16            |
| <i>Yarrowia lipolytica</i>        | PCM; 3,600                             | 0.96                     | 97.4                    | 13            |
| <i>Yarrowia lipolytica</i>        | PBM; 2,700                             | 0.94                     | 85.8                    | 14            |
| <i>Corynebacterium glutamicum</i> | UCM; 1,646                             | 0.97                     | 98%                     | In this study |
| <i>Corynebacterium glutamicum</i> | UBM; 1,916                             | 0.97                     | 98%                     | In this study |

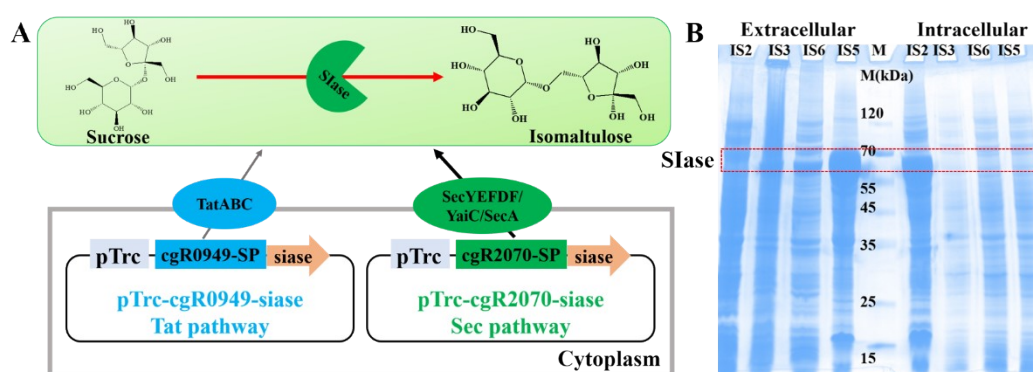

**Figure S1.** Secretory expression of sucrose isomerase in *C. glutamicum*. (A) Schematic of extracellular isomaltulose conversion. Slase, sucrose isomerase; SecYEGDF/YajC/SecA, proteins involving SEC secretion pathway; TatABC, proteins involving TAT secretion pathway. (B) SDS-PAGE of the expression of sucrose isomerase. IS2 strain, *C. glutamicum* carrying pEC-XK99E-*siase* 0 vector without native signal peptide; IS3, *C. glutamicum* carrying pEC-XK99E-*siase* 1 vector with native signal peptide; IS5, *C. glutamicum* carrying pEC-XK99E-*siase* 2 vector with cgR-2070 signal peptide through Sec pathway; IS6, *C. glutamicum* carrying pEC-XK99E-*siase* 3 vector with cgR-

0949 signal peptide through Tat pathway. Samples were collected after cultured in shake flasks for 48 h at 30°C, 200 rpm and pH 7.0.

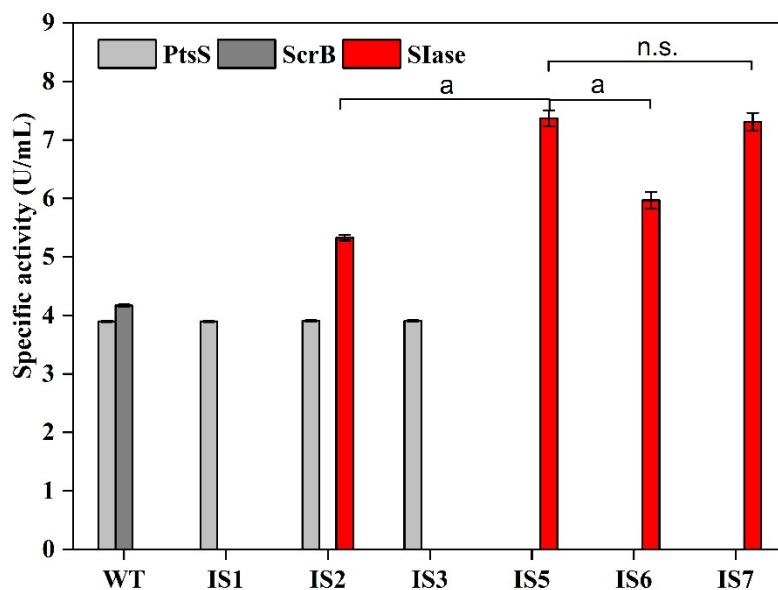

**Figure S2.** The activity of PtsS, ScrB and SIase in different strains. The strains grown on the CGXII medium at 30°C, 180 rpm for 48 h. The amount of enzyme producing 1umol/min of production was defined as one unit of enzyme activity (U). The symbol (a) was the difference ( $p < 0.05$ ) in SIase activity between two groups; n.s. meant no statistic difference.

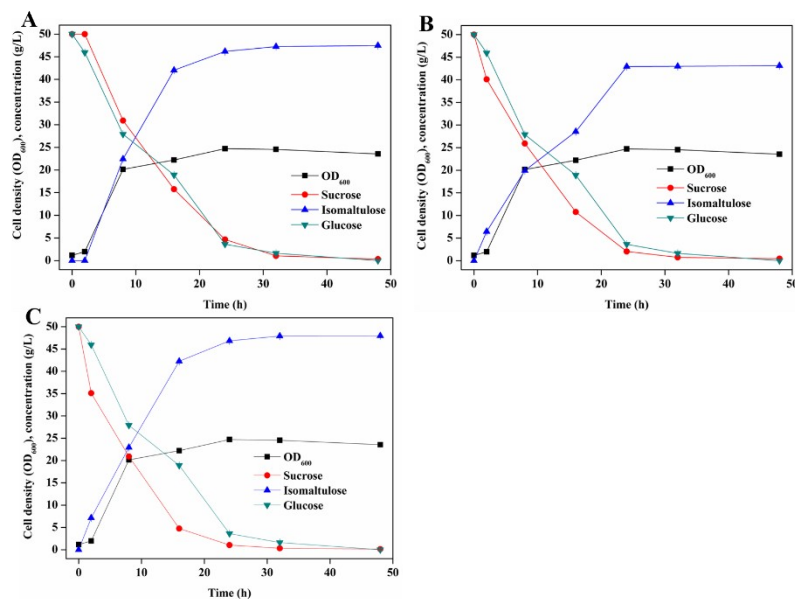

**Figure S3.** Metabolic profiles of the strains IS5, IS6 and IS7. The strains were cultured in CGXIIY medium with 50 g/L glucose and 50 g/L sucrose at 30°C and 180 rpm in 300 mL flasks with a final culture volume of 60 mL. A: The fermentation characteristics of IS5; B: the fermentation characteristics of IS6; C: the fermentation characteristics of IS7.
